# Supplementary material for: The structure of liquid thiophene from total neutron scattering
Source: Royal Society of Chemistry journal article supplement (doi:10.1039/d3cp03932c), 2023-01-01
Supplement: d3cp03932c1.pdf [file d3cp03932c1.pdf]

**Supplementary Information: The Structure of Liquid Thiophene from Total Neutron Scattering**

*Thomas F Headen,<sup>a,\*</sup> Camilla Di Mino,<sup>b,c</sup> Tristan GA Youngs,<sup>a</sup> Adam J Clancy<sup>d,\*</sup>*

- a) ISIS Facility, STFC Rutherford Appleton Laboratory, Didcot, OX11 0QX, U.K.
- b) Department of Materials, University of Oxford, 21 Banbury Rd, Oxford, OX2 6NN, U.K.
- c) Department of Physics & Astronomy, University College London, Gower St, London WC1E 6BT, U.K.
- d) Department of Chemistry, University College London, 20 Gordon St, London, WC1H 0AJ, U.K.

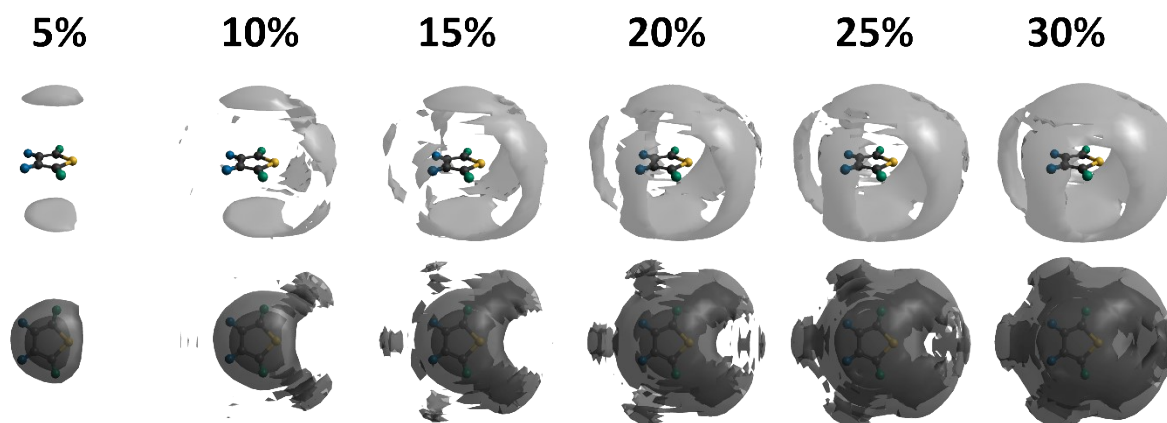

**Figure S1.** SDFs of CoR at increasing percentage most likely positions.

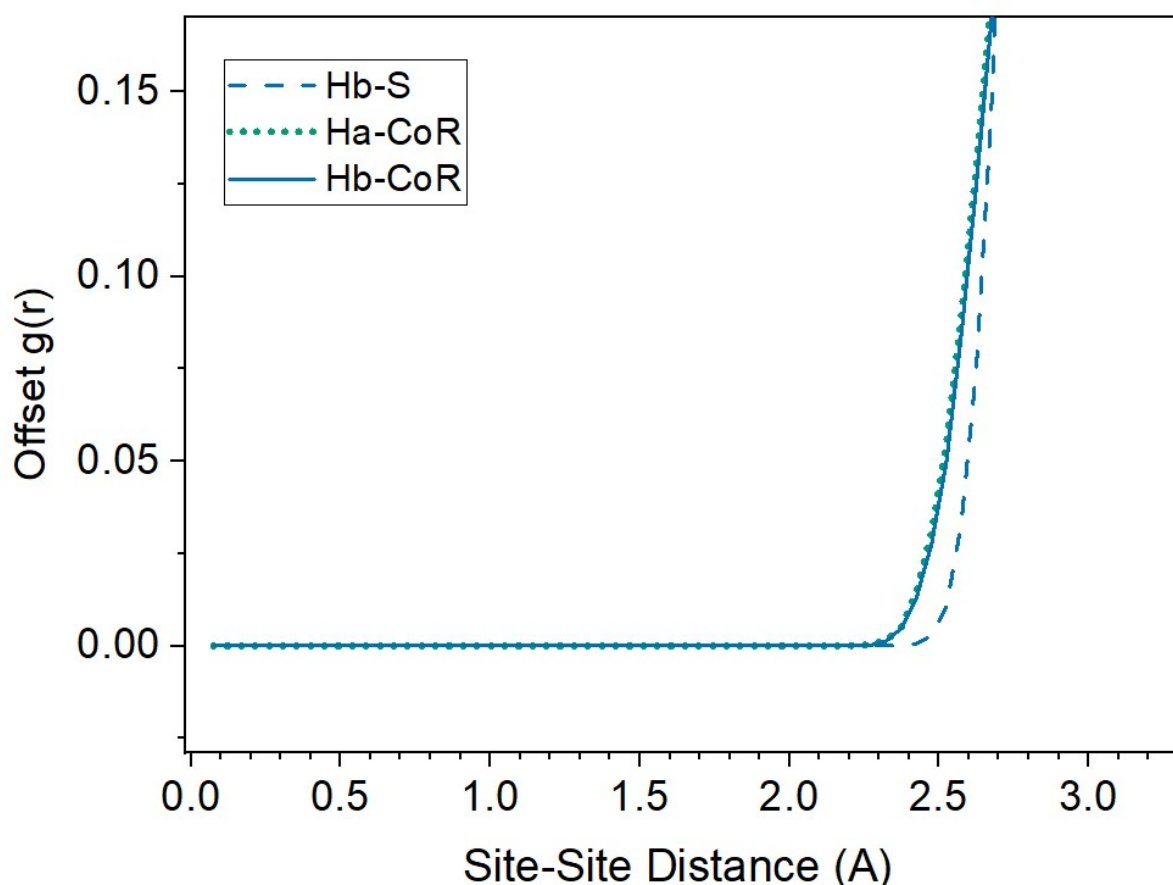

**Figure S2.** RDF of  $H_a/H_b$ -CoR and Hb-S at the peak onset, showing closest H-CoR interactions are at lower distances than the closest H-S interactions.

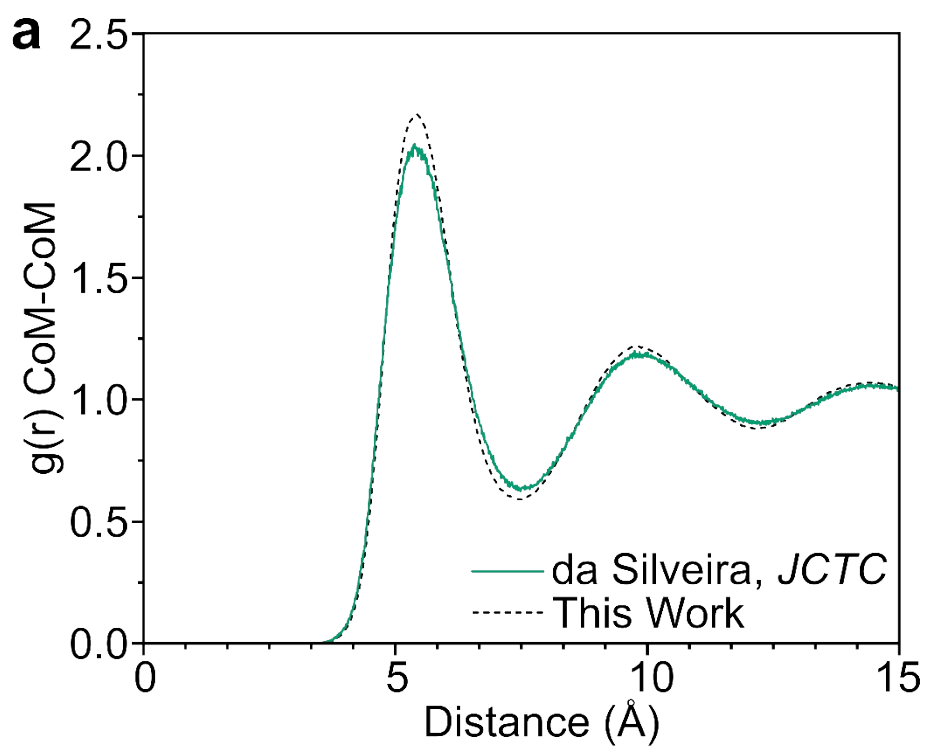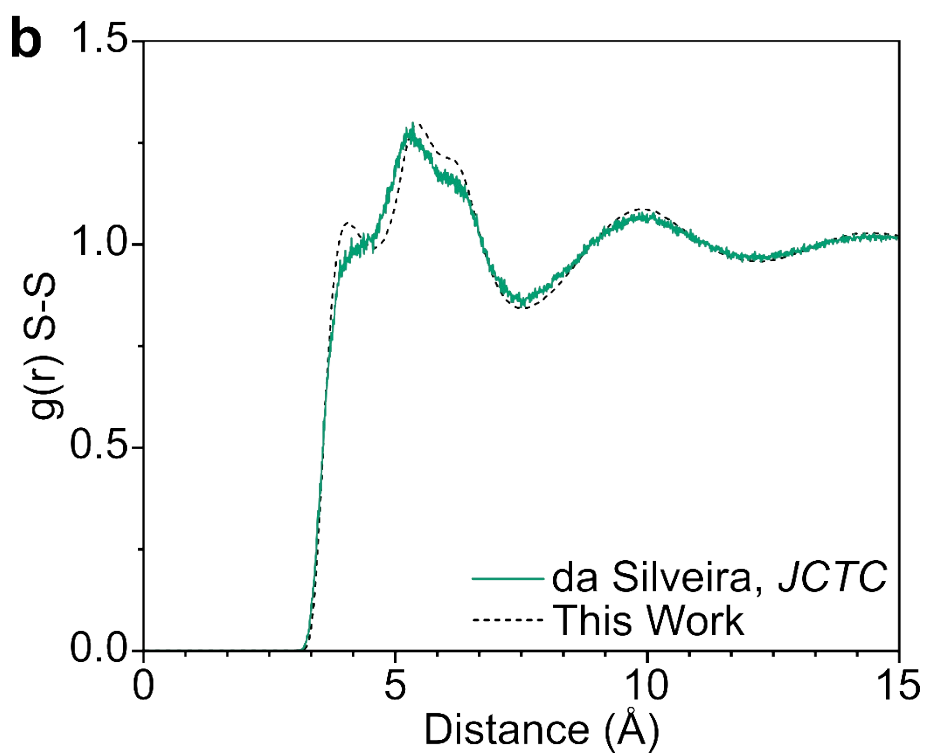

**Figure S3.** Comparison of radial distribution functions for liquid thiophene for (a) CoM-CoM and (b) S-S interactions, calculated from this work and from a DFT derived force-field in de Silveira *et al.*, *Journal of Chemical Theory and Computation*, **2018**, *14*, 4884-4900.

**Table S1.** Table of input parameters

| Atom                   | Cartesian Coordinates (Å) |       |        | Charge (e) | L. J. Seed Potentials |          |
|------------------------|---------------------------|-------|--------|------------|-----------------------|----------|
|                        | X                         | Y     | Z      |            | $\epsilon$            | $\sigma$ |
| <b>C<sub>a</sub>i</b>  | 1.516                     | 1.000 | 1.278  | -0.2488    | 0.29288               | 3.55     |
| <b>C<sub>a</sub>ii</b> | -0.941                    | 1.000 | 1.278  | -0.2473    | 0.29288               | 3.55     |
| <b>C<sub>b</sub>i</b>  | 1.000                     | 1.000 | 0.000  | -0.1551    | 0.29288               | 3.55     |
| <b>C<sub>b</sub>ii</b> | -0.425                    | 1.000 | 0.000  | -0.1548    | 0.29288               | 3.55     |
| <b>S</b>               | 0.290                     | 1.000 | 2.467  | +0.0730    | 1.48532               | 3.60     |
| <b>H<sub>a</sub>i</b>  | 2.556                     | 1.001 | 1.572  | +0.1908    | 0.12552               | 2.42     |
| <b>H<sub>a</sub>ii</b> | -1.981                    | 0.999 | 1.572  | +0.1908    | 0.12552               | 2.42     |
| <b>H<sub>b</sub>i</b>  | 1.614                     | 1.001 | -0.892 | +0.1756    | 0.12552               | 2.42     |
| <b>H<sub>b</sub>ii</b> | -1.040                    | 1.001 | -0.892 | +0.1756    | 0.12552               | 2.42     |
| <b>CoR</b>             | 0.288                     | 1.000 | 1.005  |            |                       |          |
| <b>CoM</b>             | 0.288                     | 1.000 | 1.321  |            |                       |          |
